# Supplementary material for: Relationships between structure, process and outcome to assess quality of integrated chronic disease management in a rural South African setting: applying a structural equation model
Source: PubMed Central journal article supplement (PMC5363044; doi:10.1186/s12913-017-2177-4), 2017-03-23
Supplement: 12913_2017_2177_MOESM3_ESM.pdf [file 12913_2017_2177_MOESM3_ESM.pdf]

| Labels           | Statements                                                                                                                                      |
|------------------|-------------------------------------------------------------------------------------------------------------------------------------------------|
| <b>Structure</b> |                                                                                                                                                 |
| S1               | I think my health care providers have functional equipment to provide complete chronic disease care                                             |
| S2 +             | I think this health facility has regular supply of medicines for the treatment of my illness <sup>a</sup>                                       |
| S3 -             | I think this health facility does not have regular supply of medicines for the treatment of my illness <sup>a</sup>                             |
| S4               | I am able to get health care whenever I need it                                                                                                 |
| <b>Process</b>   |                                                                                                                                                 |
| P1               | Health care providers are good about explaining the reason for medical tests                                                                    |
| P2               | Health care providers sometimes ignore what I tell them                                                                                         |
| P3               | Health care providers are professional in the conduct of their clinical duties                                                                  |
| P4               | My health care providers treat me in a very friendly and courteous manner                                                                       |
| P5 +             | Health care providers usually refer me to the hospital when there is need for the doctor to review me <sup>a</sup>                              |
| P6 -             | Health care providers do not refer me to the hospital when there is need for the doctor to review me <sup>a</sup>                               |
| P7 +             | When I miss clinic appointment(s), the Community (volunteer) Health Workers visit my house to ask why I did not come to the clinic <sup>a</sup> |
| P8 -             | The Community (volunteer) Health Workers do not visit my house when I miss clinic appointment(s) <sup>a</sup>                                   |
| P9 +             | Health care providers prepack my drugs the day before my clinic appointment(s) <sup>a</sup>                                                     |
| P10 -            | Health care providers do not prepack my drugs the day before my clinic appointment(s) <sup>a</sup>                                              |
| P11              | When I visit the clinic, the providers are careful to check everything when treating and examining me                                           |
| P12 +            | Health care providers usually spend plenty of time with me                                                                                      |
| P13 -            | Those who provide my health care sometimes hurry too much when they treat me                                                                    |
| P14              | I find it hard to get an appointment when I need it <sup>b</sup>                                                                                |
| <b>Outcome</b>   |                                                                                                                                                 |
| O1 +             | I am satisfied with the quality of coherent integrated chronic disease care that I receive <sup>b</sup>                                         |
| O2 -             | I am dissatisfied with the quality of coherent integrated chronic disease care that I receive <sup>b</sup>                                      |
| O3               | Sometimes health care providers make me wonder if their diagnosis is correct                                                                    |
| O4               | When I come to receive health care, i have to wait for too long to access services <sup>b</sup>                                                 |
| O5               | I have some doubts about the ability of the health care providers who treat me                                                                  |
| <b>Dropped</b>   |                                                                                                                                                 |
| D1 +             | I feel confident that I can get the health care I need without being set back financially                                                       |
| D2 -             | I have to pay for more of my health care than I can afford                                                                                      |

<sup>a</sup>Priority areas of the ICDM model in South Africa

<sup>b</sup>Priority areas of the ICDM model in South Africa originally contained in the PSQ-18

+ sign indicates positive statements phrased in opposite directions

- sign indicates negative statements phrased in opposite directions

Dropped: statements excluded from the adapted PSQ because of free PHC service offered in South Africa
