# Supplementary material for: Relationships between structure, process and outcome to assess quality of integrated chronic disease management in a rural South African setting: applying a structural equation model
Source: Springer Nature journal article supplement (doi:10.1186/s12913-017-2177-4), 2017-03-23
Supplement: MOESM1 [file 12169346]

| Health facilities | Number of patients recorded in the clinic appointment roaster in July 2013. |      |    |       | *Step 1 sampling: proportionate sampling from the health facilities | **Step 2 sampling: stratified sampling by chronic disease status |     |    |
|-------------------|-----------------------------------------------------------------------------|------|----|-------|---------------------------------------------------------------------|------------------------------------------------------------------|-----|----|
|                   | ART                                                                         | HPT  | DM | Total |                                                                     | ART                                                              | HPT | DM |
| A                 | 724                                                                         | 642  | -  | 1366  | 165                                                                 | 88                                                               | 77  | 0  |
| B                 | 146                                                                         | 715  | -  | 861   | 104                                                                 | 18                                                               | 86  | 0  |
| C                 | 41                                                                          | 325  | 7  | 373   | 45                                                                  | 5                                                                | 39  | 1  |
| D                 | 84                                                                          | 274  | 6  | 364   | 44                                                                  | 10                                                               | 33  | 1  |
| E                 | 66                                                                          | 50   | -  | 116   | 14                                                                  | 8                                                                | 6   | 0  |
| F                 | 50                                                                          | 215  | -  | 265   | 32                                                                  | 6                                                                | 26  | 0  |
| G                 | 49                                                                          | 208  | -  | 257   | 31                                                                  | 6                                                                | 25  | 0  |
| Total             | 1160                                                                        | 2429 | 13 | 3602  | 435                                                                 | 141                                                              | 292 | 2  |

**#HIV, HPT and DM = HIV/AIDS, hypertension and diabetes mellitus patients, respectively.**

**\*Step 1: proportionate sampling for each health facility was achieved by multiplying the sampling fraction by the total number of patients in each health facility**

Sampling fraction =  $435/3602 = 0.1207$

Where 435 = calculated study sample size and 3602 = total sampling frame

Example of proportionate sampling for clinic A:  $0.1207 \times 1366 = 165$ , where 1366 is the total number of patients in health facility A.

**\*\*Step 2: stratified sampling in each health facility**

Example of stratified sampling in health facility A

53% (724/1366) and 47% (642/1366) of the total number of patients in health facility A were HIV patients. Of the 165 patients recruited in health facility A, 53% (n=88) were HIV patients and 47% (n=77) were hypertension patients.
