# Supplementary material for: Relationships between structure, process and outcome to assess quality of integrated chronic disease management in a rural South African setting: applying a structural equation model
Source: Springer Nature journal article supplement (doi:10.1186/s12913-017-2177-4), 2017-03-23
Supplement: MOESM4 [file 12169346]

| Labels    | Statements                                                                                                                                                    |
|-----------|---------------------------------------------------------------------------------------------------------------------------------------------------------------|
| Structure |                                                                                                                                                               |
| S1        | I think the health care providers have functional equipment to provide complete chronic disease care                                                          |
| S2 +      | I think this health facility has regular supply of medicines for the treatment of chronic diseases <sup>a</sup>                                               |
| S3 -      | I think this health facility does not have regular supply of medicines for the treatment of chronic diseases <sup>a</sup>                                     |
| S4        | The patients are able to get health care whenever they need it                                                                                                |
| Process   |                                                                                                                                                               |
| P1        | Health care providers are good about explaining the reason for medical tests                                                                                  |
| P2        | Health care providers sometimes ignore what patients tell them                                                                                                |
| P3        | Health care providers are professional in the conduct of their clinical duties                                                                                |
| P4        | Health care providers treat chronic disease patients in a very friendly and courteous manner                                                                  |
| P5 +      | Health care providers usually refer patients to the hospital when there is need for the doctor to review them <sup>a</sup>                                    |
| P6 -      | Health care providers do not refer patients to the hospital when there is need for the doctor to review them <sup>a</sup>                                     |
| P7 +      | When patients miss clinic appointment(s), the Community (volunteer) Health Workers visit their houses to ask why they did not come to the clinic <sup>a</sup> |
| P8 -      | The Community (volunteer) Health Workers do not visit patients' houses when they miss clinic appointment(s) <sup>a</sup>                                      |
| P9 +      | Health care providers prepack patients' drugs the day before their clinic appointment(s) <sup>a</sup>                                                         |
| P10 -     | Health care providers do not prepack patients' drugs the day before their clinic appointment(s) <sup>a</sup>                                                  |
| P11       | When patients visit the clinic, the providers are careful to check everything when treating and examining them                                                |
| P12 +     | Health care providers usually spend plenty of time with patients                                                                                              |
| P13 -     | Those who provide health care sometimes hurry too much when they treat patients                                                                               |
| P14       | Patients find it hard to get an appointment when they need it <sup>b</sup>                                                                                    |
| Outcome   |                                                                                                                                                               |
| O1 +      | I am satisfied with the quality of coherent integrated chronic disease care patients receive <sup>b</sup>                                                     |
| O2 -      | I am dissatisfied with the quality of coherent integrated disease care patients receive <sup>b</sup>                                                          |
| O3        | Sometimes health care providers make me wonder if their diagnosis is correct                                                                                  |
| O4        | When patients come to receive health care, they have to wait for too long to access services <sup>b</sup>                                                     |
| O5        | I have some doubts about the ability of the health care providers who treat the patients                                                                      |

<sup>a</sup>Priority areas of the ICDM model in South Africa

<sup>b</sup>Priority areas of the ICDM model in South Africa originally contained in the PSQ-18

+ sign indicates positive statements phrased in opposite directions

- sign indicates negative statements phrased in opposite directions
