# Supplementary material for: Relationships between structure, process and outcome to assess quality of integrated chronic disease management in a rural South African setting: applying a structural equation model
Source: Springer Nature journal article supplement (doi:10.1186/s12913-017-2177-4), 2017-03-23
Supplement: MOESM6 [file 12169346]

| Terms                                        | Definition                                                                                              |
|----------------------------------------------|---------------------------------------------------------------------------------------------------------|
| Critical medicines                           | Anti-hypertension, antiretroviral and anti-diabetic drugs                                               |
| Hospital referral                            | Referral of chronic disease patients by the professional nurses to the district hospitals               |
| Defaulter tracing                            | Search for patients who did not attend a clinic following previous clinic appointment                   |
| Prepacking of medicines                      | Packing of patients' medicines before commencement of routine clinic activities                         |
| Clinic appointments                          | An appointment system in which a healthcare worker books a patient for a subsequent follow-up visit     |
| Patient waiting time                         | The period between the arrival of patients to a health facility and when they leave the health facility |
| Coherence of integrated chronic disease care | Consistency and continuity in the provision of care that is convenient for patients                     |
